# Supplementary material for: Massively Parallel Sequencing Reveals the Complex Structure of an Irradiated Human Chromosome on a Mouse Background in the Tc1 Model of Down Syndrome
Source: PLoS One. 2013 Apr 15;8(4):e60482. doi: 10.1371/journal.pone.0060482 (PMC3626651; doi:10.1371/journal.pone.0060482)
Supplement: Table S2 — Copy number changes detected in HT1080 cell line DNA by high resolution aCGH. Details of the hybridisation of HT1080 genomic DNA to the CGH array, delineating contiguous regions (start, stop) that have a similar log2 hybridisation ratio, (base pair positions according to human genome build 19), thus identifying the break-points of copy number changes on the chromosome. The number of known copy number variations (CNVs) in each region (Conrad et al., 2010, Nature, 464, 704-12) and the % overlap between the regions found in HT1080 and the known CNV. (XLS) [file pone.0060482.s007.xls]

## Sheet: final_H80_callList
Table S2. Copy number changes detected in HT1080 cell line DNA by high resolution aCGH
Hsa21 start position (bp)	Hsa21 stop position (bp)	log2 (Tc1 signal/reference sequence signal)	no. of probes	Size of region (bp)	no of known CNVs in call	% overlap with known CNV
15809410	15810029	-1.2846	16	619	0	0
16005650	16006256	-3.53788	13	606	0	0
17004985	17005629	0.804031	18	644	0	0
17345810	17346100	0.591974	10	290	0	0
18371090	18371957	-0.603376	11	867	0	0
19674664	19675309	-0.665902	11	645	0	0
20829170	20830669	-0.554903	12	1499	0	0
21388469	21389301	0.641742	19	832	0	0
21701970	21702909	0.554766	25	939	0	0
21760082	21760429	0.538238	10	347	0	0
22881769	22882349	-0.667255	16	580	0	0
25088594	25089389	0.566079	20	795	0	0
25282381	25282965	0.549334	16	584	1	100
25423170	25424309	0.517223	16	1139	0	0
26475570	26476509	0.534198	14	939	0	0
26484234	26484909	0.580154	14	675	0	0
26585490	26586109	0.515745	14	619	0	0
30176488	30177590	1.25698	18	1102	0	0
32517575	32518410	0.510299	10	835	0	0
33499326	33500064	0.915241	20	738	0	0
35458196	35459133	0.531185	15	937	0	0
36480516	36481006	1.32975	10	490	0	0
39449391	39450015	-0.658303	10	624	0	0
40322481	40322894	0.512737	11	413	0	0
40604007	40604329	0.533991	20	322	0	0
41246515	41247947	1.50648	24	1432	0	0
41258515	41259466	0.707886	23	951	0	0
42097875	42098494	1.25863	12	619	0	0
42219235	42219926	0.99356	17	691	0	0
42634595	42636032	0.558208	24	1437	0	0
44095749	44098521	-0.882966	25	2772	0	0
44730569	44732623	-1.15609	17	2054	0	0
47072291	47073490	0.574587	12	1199	0	0
47445077	47445817	0.534209	10	740	0	0
