# Supplementary material for: Massively Parallel Sequencing Reveals the Complex Structure of an Irradiated Human Chromosome on a Mouse Background in the Tc1 Model of Down Syndrome
Source: PLoS One. 2013 Apr 15;8(4):e60482. doi: 10.1371/journal.pone.0060482 (PMC3626651; doi:10.1371/journal.pone.0060482)
Supplement: Table S3 — Details of NGS libraries prepared from Tc1 mice and obtained sequence yields, number of correctly mapping reads and achieved sequence fold coverage on chromosome 21. (XLS) [file pone.0060482.s008.xls]

## Sheet: DNA detail
Table S3. Details of NGS libraries prepared from Tc1 mice and obtained sequence yields, number of correctly mapping reads and achieved sequence fold coverage on chromosome 21
Library	Flow sorted 200 bp	Flow sorted 500 bp	Total genomic 500 bp	Total genomic 4000 bp (1)	Total genomic 4000 bp (2)
DNA source	flow sorted Hsa21	flow sorted Hsa21	Total genomic DNA	Total genomic DNA	Total genomic DNA
No of chromosomes	8 x 250,000	8 x 250,000	NA	NA	NA
Tissue source	Spleen	Spleen	Tail	Tail	Tail
Library type	paired end, high complexity	paired end, high complexity	paired end, no PCR	paired end, high complexity	paired end, long range and double size selected
Read length	37	36	54	37	54
No. correct read pairs	21807871	14808930	97725230	5974572	24790908
No. correct pairs on 21	2709626	6250147	666348	20559	122159
Fold coverage	11.345	69.25	7.77	1.404	9.95
