# Supplementary material for: Massively Parallel Sequencing Reveals the Complex Structure of an Irradiated Human Chromosome on a Mouse Background in the Tc1 Model of Down Syndrome
Source: PLoS One. 2013 Apr 15;8(4):e60482. doi: 10.1371/journal.pone.0060482 (PMC3626651; doi:10.1371/journal.pone.0060482)
Supplement: Table S4 — RefSeq genes (The NCBI RefSeqGene Project, http://www.ncbi.nlm.nih.gov/projects/RefSeq/RSG/, RefSeq release no.42) on human chromosome 21. The copy number and rearrangement status of each gene is listed. (XLS) [file pone.0060482.s009.xls]

## Sheet: Sheet1
Table S4. RefSeq genes (The NCBI RefSeqGene Project, http://www.ncbi.nlm.nih.gov/projects/RefSeq/RSG/, RefSeq release no.42) on human chromosome 21, hg19.
RefSeq ID	Start position Hsa21	End position Hsa21	Gene Name	Copy number on Tc1-Hsa21	Structurally rearranged on Tc1-Hsa21
NM_001033515	9907193	9968585	LOC100132288	copy number1
NM_199259	10906742	10990920	TPTE	copy number1
NM_182484	11020841	11098925	BAGE5	duplicated	Rearranged
NM_181704	11020841	11098925	BAGE4	duplicated	Rearranged
NM_182482	11020841	11098925	BAGE2	duplicated	Rearranged
NM_182481	11020841	11098925	BAGE3	duplicated	Rearranged
NM_001187	11057795	11098937	BAGE	duplicated	Rearranged
NR_026916	14410486	14490571	ANKRD30BP2	copy number1
NR_036164	14778704	14778781	MIR3156-3	copy number1
NM_174981	14982497	15013906	POTED	copy number1
NR_026755	15215453	15220685	C21orf15	copy number1
NR_027270	15316095	15352765	C21orf81	copy number1
NM_198996	15481134	15579254	LIPI	partially duplicated
NM_144770	15588465	15600693	RBM11	duplicated
NR_003087	15646119	15673692	ABCC13	duplicated
NM_006948	15743436	15755509	HSPA13	duplicated
NM_022136	15857548	15918664	SAMSN1	duplicated
NM_003489	16333555	16437126	NRIP1	duplicated
NM_013396	17102495	17252377	USP25	duplicated
NR_027790	17442841	17982094	C21orf34	partially duplicated	Rearranged
NR_029514	17911408	17911489	MIR99A	copy number1
NR_029480	17912147	17912231	MIRLET7C	copy number1
NR_029694	17962556	17962645	MIR125B2	copy number1
NM_001338	18885329	18939266	CXADR	copy number1
NM_006806	18965967	18985268	BTG3	deleted
NM_001100420	19161283	19191703	C21orf91	deleted
NR_024354	19207988	19257925	NCRNA00157	deleted
NM_024944	19617149	19639687	CHODL	deleted
NM_002772	19641432	19775970	TMPRSS15	partially deleted	Rearranged
NR_024090	22114912	22175426	C21orf131	duplicated
NM_004540	22370632	22911214	NCAM2	partially duplicated	Rearranged
NR_024027	26758132	26804013	NCRNA00158	copy number1
NR_001458	26934456	26947480	MIR155HG	copy number1
NR_030784	26946291	26946356	MIR155	copy number1
NR_024092	26955086	26955536	C21orf71	copy number1
NM_080794	26957967	26979801	MRPL39	copy number1
NM_021219	27011588	27087235	JAM2	copy number1
NM_001003703	27096790	27107965	ATP5J	copy number1
NM_001197297	27107257	27144771	GABPA	copy number1
NM_201413	27252860	27543138	APP	copy number1	Rearranged
NM_052954	27838527	27945581	CYYR1	copy number1
NM_006988	28208605	28217728	ADAMTS1	copy number1
NM_007038	28290230	28339439	ADAMTS5	copy number1
NR_024357	29094697	29123552	NCRNA00113	copy number1
NR_027246	29385681	29395528	C21orf94	copy number1
NR_026552	29911639	29912677	NCRNA00161	copy number1
NM_013240	30244512	30257693	N6AMT1	copy number1
NM_015565	30300465	30365277	LTN1	copy number1
NM_016940	30378079	30391685	RWDD2B	copy number1
NM_006447	30396937	30426807	USP16	copy number1
NM_006585	30428647	30446010	CCT8	copy number1
NM_020152	30452872	30548202	C21orf7	copy number1
NR_027072	30565800	30660526	NCRNA00189	copy number1
NM_001186/NR_027655	30671219	30734217	BACH1	copy number1
NM_175611	30909253	31312282	GRIK1	copy number1
NR_033368	30968359	31003067	NCRNA00258	copy number1
NR_027021	31120493	31136325	GRIK1AS	copy number1
NM_012131	31538240	31538971	CLDN17	copy number1
NM_199328	31586323	31588469	CLDN8	copy number1
NM_001085455	31653626	31655276	KRTAP24-1	copy number1
NM_001128598	31661462	31661832	KRTAP25-1	copy number1
NM_203405	31691449	31692607	KRTAP26-1	copy number1
NM_001077711	31709330	31710012	KRTAP27-1	copy number1
NM_181624	31720716	31720924	KRTAP23-1	copy number1
NM_181621	31743708	31744557	KRTAP13-2	copy number1
NR_036221	31747611	31747696	MIR4327	copy number1
NM_181599	31768391	31769138	KRTAP13-1	copy number1
NM_181622	31797710	31798230	KRTAP13-3	copy number1
NM_181600	31802593	31803076	KRTAP13-4	copy number1
NM_181623	31812645	31813098	KRTAP15-1	copy number1
NM_181607	31852363	31852636	KRTAP19-1	copy number1
NM_181608	31859508	31859667	KRTAP19-2	copy number1
NM_181609	31863781	31864275	KRTAP19-3	copy number1
NM_181610	31869173	31869428	KRTAP19-4	copy number1
NM_181611	31874189	31874408	KRTAP19-5	copy number1
NM_181612	31913853	31914181	KRTAP19-6	copy number1
NM_181614	31933416	31933608	KRTAP19-7	copy number1
NM_001164434	31962423	31962716	KRTAP22-2	copy number1
NM_181605	31964758	31965374	KRTAP6-3	copy number1
NM_181604	31971004	31971193	KRTAP6-2	copy number1
NM_181620	31973439	31973586	KRTAP22-1	copy number1
NM_181602	31986004	31986223	KRTAP6-1	copy number1
NM_181615	31988773	31988944	KRTAP20-1	copy number1
NR_023342	31992945	31993169	KRTAP20-4	copy number1
NM_181616	32007582	32007780	KRTAP20-2	copy number1
NM_001128077	32015182	32015455	KRTAP20-3	copy number1
NM_001164435	32090842	32091095	KRTAP21-3	copy number1
NM_181617	32119268	32119520	KRTAP21-2	copy number1
NM_181619	32127456	32127696	KRTAP21-1	copy number1
NM_175857	32185014	32185570	KRTAP8-1	copy number1
NM_181606	32201357	32202051	KRTAP7-1	copy number1
NM_175858	32252963	32253874	KRTAP11-1	copy number1
NM_001099219	32410477	32410795	KRTAP19-8	copy number1
NM_003253	32490735	32931290	TIAM1	copy number1
NM_000454	33031934	33041243	SOD1	copy number1
NM_001145445	33043312	33104431	SFRS15	copy number1
NM_014586	33245627	33376377	HUNK	copy number1
NR_024352	33452628	33528816	NCRNA00159	copy number1
NM_018944	33640529	33651376	C21orf45	deleted
NM_206898	33664123	33687094	MRAP	deleted
NM_014825	33683329	33765312	URB1	deleted
NR_002996	33749495	33749631	SNORA80	deleted
NR_026845	33765441	33766266	C21orf119	deleted
NM_058187	33784751	33887697	C21orf63	deleted
NM_144659	33947150	33957845	TCP10L	deleted
NM_021254	33973983	33984918	C21orf59	deleted
NM_003895	34001068	34100351	SYNJ1	deleted
NM_016631	34106209	34144169	GCFC1	deleted
NR_024622	34144410	34170016	C21orf49	deleted
NM_001162496	34162983	34186053	C21orf62	deleted
NM_005806	34398238	34401500	OLIG2	deleted
NM_138983	34442449	34444728	OLIG1	deleted
NR_024102	34537775	34542541	C21orf54	deleted
NM_207585	34602230	34636820	IFNAR2	deleted
NM_000628	34638671	34669520	IL10RB	deleted
NM_000629	34697213	34732128	IFNAR1	deleted
NM_005534	34775201	34809828	IFNGR2	deleted
NM_006134	34821447	34852281	TMEM50B	deleted
NM_001040192	34860237	34864023	DNAJC28	deleted
NM_001136006	34876237	34915198	GART	deleted
NM_138927	34915349	34949812	SON	deleted
NM_017613	34950210	34961014	DONSON	deleted
NM_145858	34961647	35014160	CRYZL1	deleted
NM_003024	35014783	35261609	ITSN1	deleted
NM_001697	35275756	35288158	ATP5O	deleted
NM_032476	35445822	35515334	MRPS6	deleted
NM_006933	35445869	35478561	SLC5A3	deleted
NR_027266	35552977	35562220	C21orf82	deleted
NM_172201	35736322	35743440	KCNE2	deleted
NM_058182	35747748	35761452	FAM165B	deleted
NM_000219	35818987	35883613	KCNE1	deleted
NM_203418	35888783	35899261	RCAN1	deleted
NM_053277	36041687	36090519	CLIC6	deleted
NR_024351	36096104	36109479	NCRNA00160	deleted
NM_001754	36160097	36421595	RUNX1	partially deleted	Rearranged
NR_026812	36410232	36411723	C21orf96	copy number1
NR_030414	37093012	37093106	MIR802	copy number1
NM_017438	37406838	37432816	SETD4	copy number1
NM_001757	37442284	37445462	CBR1	copy number1
NM_001236	37507262	37518860	CBR3	copy number1
NM_005128	37536838	37666572	DOPEY2	copy number1
NM_015358	37692486	37748944	MORC3	copy number1
NM_005441	37757688	37789125	CHAF1B	copy number1
NM_001146077	37832919	37948867	CLDN14	copy number1
NM_005069	38071990	38122510	SIM2	copy number1
NM_000411	38123188	38362536	HLCS	copy number1
NM_018962	38378862	38391958	DSCR6	copy number1
NM_153682	38437663	38445458	PIGP	copy number1
NM_003316	38455246	38575408	TTC3	copy number1
NR_026719	38580954	38592893	DSCR9	copy number1
NM_006052	38595725	38639833	DSCR3	copy number1
NM_101395	38739858	38887679	DYRK1A	copy number1
NM_002240	38996785	39288696	KCNJ6	copy number1
NM_005867	39426312	39493454	DSCR4	copy number1
NR_026842	39493544	39528605	DSCR8	copy number1
NR_027695	39578249	39580738	DSCR10	copy number1
NM_002243	39628663	39673746	KCNJ15	copy number1
NM_001136154	39751949	40033704	ERG	copy number1
NR_027067/NR_027065	40110878	40145401	NCRNA00114	copy number1
NM_005239	40177848	40196878	ETS2	copy number1
NM_203433	40547383	40555440	PSMG1	copy number1
NM_018963	40557403	40685556	BRWD1	copy number1
NR_033800	40685860	40686888	NCRNA00257	copy number1
NM_004965	40714240	40721047	HMGN1	copy number1
NM_004627	40752212	40769815	WRB	copy number1
NM_152505	40777769	40816128	LCA5L	copy number1
NM_001001713	40817796	40887433	SH3BGR	copy number1
NR_026542	40969074	40984749	C21orf88	copy number1
NM_033170	41029253	41034815	B3GALT5	copy number1
NM_001080444	41117333	41174023	IGSF5	copy number1
NM_006198	41239346	41301322	PCP4	copy number1
NM_001389	41384342	42219039	DSCAM	copy number1
NR_024100	42513426	42519991	C21orf130	copy number1
NR_036167	42539483	42539556	MIR3197	copy number1
NM_138991	42539727	42648524	BACE2	copy number1
NM_182832	42547157	42557166	PLAC4	copy number1
NM_058186	42688660	42729654	FAM3B	copy number1
NM_002463	42733949	42780869	MX2	copy number1
NM_001144925	42792519	42831141	MX1	copy number1
NM_005656	42836477	42880085	TMPRSS2	copy number1
NR_024367	43099461	43117496	NCRNA00111	copy number1
NR_027272	43131679	43135935	C21orf129	copy number1
NR_024028	43136595	43137742	NCRNA00112	copy number1
NM_020639	43159528	43187249	RIPK4	copy number1
NM_001040424/NM_022115	43218384	43299591	PRDM15	copy number1
NM_015500	43305218	43373999	C2CD2	copy number1
NM_020727	43406939	43430496	ZNF295	copy number1
NR_027273	43442112	43445060	C21orf121	copy number1
NM_173568	43491425	43563105	UMODL1	copy number1
NR_027243	43522243	43528644	C21orf128	copy number1
NM_207627	43619798	43717354	ABCG1	copy number1
NM_003226	43731776	43735706	TFF3	copy number1
NM_005423	43766466	43771208	TFF2	copy number1
NM_003225	43782390	43786644	TFF1	copy number1
NM_024022	43791995	43816200	TMPRSS3	copy number1
NM_018961	43824018	43867774	UBASH3A	copy number1
NM_080860	43892596	43916401	RSPH1	copy number1
NM_018964	43919741	44001550	SLC37A1	copy number1
NM_001001577	44073861	44195618	PDE9A	copy number1
NM_033661	44263203	44299678	WDR4	copy number1
NM_021075	44313377	44329773	NDUFV3	copy number1	Rearranged
NM_004571	44394642	44453688	PKNOX1	copy number1
NM_001178008	44473300	44496472	CBS	copy number1
NM_006758	44513065	44527688	U2AF1	copy number1
NM_000394	44589140	44592913	CRYAA	copy number1
NM_173354	44834397	44847002	SIK1	copy number1
NR_026960	44869903	44873771	C21orf125	copy number1
NR_026863	44881973	44898103	C21orf84	copy number1
NM_007031	44949071	45079374	HSF2BP	copy number1
NM_015056	45079431	45115960	RRP1B	copy number1
NM_003681	45138977	45182188	PDXK	copy number1
NM_000100	45193830	45196259	CSTB	copy number1
NM_003683	45209417	45223983	RRP1	copy number1
NR_026961	45225638	45232448	LOC284837	copy number1
NM_020132	45285115	45407475	AGPAT3	copy number1
NM_003274	45432205	45526432	TRAPPC10	copy number1
NM_005049	45527207	45551063	PWP2	copy number1
NM_198155	45553493	45565605	C21orf33	copy number1
NM_015259	45646721	45660834	ICOSLG	copy number1
NM_175867	45666222	45682099	DNMT3L	copy number1
NM_000383/NM_000658	45705762	45718110	AIRE	copy number1
NR_024108	45719924	45747261	PFKL	copy number1
NM_004928	45748826	45759285	C21orf2	copy number1
NM_003307	45773483	45862964	TRPM2	copy number1	Rearranged
NM_030891	45875392	45878739	LRRC3	copy number1
NM_144991	45917774	46131495	C21orf29	copy number1
NR_026547	45937097	45938860	C21orf90	copy number1
NM_198691	45959067	45960078	KRTAP10-1	copy number1
NM_198693	45970317	45971388	KRTAP10-2	copy number1
NM_198696	45977905	45978643	KRTAP10-3	copy number1
NM_198687	45993605	45994987	KRTAP10-4	copy number1
NM_198694	45999563	46000481	KRTAP10-5	copy number1
NM_198688	46011148	46012386	KRTAP10-6	copy number1
NM_198689	46020496	46022091	KRTAP10-7	copy number1
NM_198695	46031995	46032871	KRTAP10-8	copy number1
NM_198690	46047039	46048295	KRTAP10-9	copy number1
NM_181688	46057272	46058372	KRTAP10-10	copy number1
NM_198692	46066330	46067566	KRTAP10-11	copy number1
NM_198698	46074129	46074576	KRTAP12-4	copy number1
NM_198697	46077848	46078258	KRTAP12-3	copy number1
NM_181684	46086105	46086844	KRTAP12-2	copy number1
NM_181686	46101490	46102078	KRTAP12-1	copy number1
NM_198699	46117086	46117959	KRTAP10-12	copy number1
NM_182688	46188954	46221738	UBE2G2	copy number1
NM_006936	46225531	46238044	SUMO3	copy number1
NM_004339	46269512	46293741	PTTG1IP	copy number1
NM_001127491	46305867	46348753	ITGB2	copy number1
NR_027128	46353198	46359828	C21orf67	copy number1
NM_058190	46359954	46396888	C21orf70	copy number1
NR_033840	46409778	46414001	NCRNA00163	copy number1
NR_024089	46419126	46424642	NCRNA00162	copy number1
NR_027292	46490870	46493126	C21orf122	copy number1
NM_015834	46494492	46646478	ADARB1	copy number1
NM_015227	46683842	46707811	POFUT2	copy number1
NR_026943	46707966	46717269	LOC642852	copy number1
NM_130445	46825096	46933634	COL18A1	partially deleted	Rearranged
NR_027498	46839630	46844985	NCRNA00175	copy number1
NM_194255	46934628	46962351	SLC19A1	deleted
NM_001130141	47269874	47362368	PCBP3	partially deleted	Rearranged
NM_001848	47401662	47424963	COL6A1	copy number1
NM_001849	47518032	47552763	COL6A2	copy number1
NM_006657	47556175	47575481	FTCD	copy number1
NM_001142854	47581061	47604373	C21orf56	copy number1
NM_001001438	47608359	47648738	LSS	copy number1
NR_002776	47649157	47671604	MCM3APAS	copy number1
NM_003906	47655047	47705236	MCM3AP	copy number1
NM_058181	47706266	47717665	C21orf57	copy number1
NM_058180	47721046	47743785	C21orf58	copy number1
NM_006031	47744035	47865682	PCNT	copy number1
NM_001146116	47878861	47989926	DIP2A	partially duplicated	Rearranged
NM_006272	48018530	48025035	S100B	duplicated
NM_206962	48055526	48084863	PRMT2	duplicated
