# Supplementary material for: Massively Parallel Sequencing Reveals the Complex Structure of an Irradiated Human Chromosome on a Mouse Background in the Tc1 Model of Down Syndrome
Source: PLoS One. 2013 Apr 15;8(4):e60482. doi: 10.1371/journal.pone.0060482 (PMC3626651; doi:10.1371/journal.pone.0060482)
Supplement: Table S6 — Details of the bacterial artificial clones and fosmid clones used as in situ hybridisation probes. (XLS) [file pone.0060482.s011.xls]

## Sheet: Sheet1
Table S6. Details of the bacterial artificial clones and fosmid clones used as in situ hybridisation probes.
Clone ID in this report	Clone	Start position (hg19)	End position (hg19)
1	Chr21tp-2H11	11010313	11175233
2	Chr21tp-1B8	14957548	15121900
3	Chr21tp-3G5	17049105	17215700
4	Chr21tp-3E7	19086604	19257345
5	Chr21tp-3E1	20568189	20719145
6	Chr21tp-1E5	21891858	22041214
7	Chr21tp-1H1	23861223	24021633
8	Chr21tp-3D7	25773957	25972591
9	Chr21tp-2A12	27721567	27895088
10	Chr21tp-1F5	29755981	29927421
11	Chr21tp-3B8	31712163	31908166
12	Chr21tp-2E1	33695058	33891417
13	Chr21tp-3F8	35751824	35931003
14	Chr21tp-1C3	37755938	37931035
15	Chr21tp-3H7	39682967	39863731
16	Chr21tp-3A12	41782686	41975589
17	Chr21tp-3H3	43977853	44156006
18	Chr21tp-3B10	45998320	46197880
19	Chr21tp-1E9	47799599	47944430
fd1	G248P88930F9	16187177	16225643
fd2	G248P8035E10	21683265	21724901
fd3	G248P86489D4	23239227	23274243
fd4	G248P89146G3	24588078	24641010
fd5	G248P80282B11	26085289	26121908
fd6	G248P83735B5	48026313	48068856
fs3	G248P8304C6	17845660	17884318
fT	G248P85430E2	10913305	10952871
CX	G248P80842D11	18879591	18921343
