# Supplementary material for: Massively Parallel Sequencing Reveals the Complex Structure of an Irradiated Human Chromosome on a Mouse Background in the Tc1 Model of Down Syndrome
Source: PLoS One. 2013 Apr 15;8(4):e60482. doi: 10.1371/journal.pone.0060482 (PMC3626651; doi:10.1371/journal.pone.0060482)
Supplement: Table S7 — Rearrangement breakpoints unique to Tc1 Hsa21 and their consequence to gene disruption. Breakpoint position at base pair resolution obtained by sequencing a PCR amplified junction fragment (column 1); ▪, indicates breakpoint was not PCR verified so position is not accurate to base pair resolution; •, indicates the rearrangement was only detected in paired sequence read data obtained in large insert libraries; †† indicates breakpoint is between 24880910 and 24880958, * indicates insertion that’s only known homology is with a region on chromosome 4 (chr4_gl000194_random, 190017–190455); Un, indicates bases of unknown origin; **, indicates chr21 9826532–9826580; ▴ indicates bases 23648470–23648476 appear in 2 breakpoint junction fragments, † indicates bases 23306917–23306930 appear in 2 breakpoint junction fragments; ♦, indicates AT repeat at the breakpoint is most likely to come from the 44314438 side of the breakpoint. Underlined bases are inserted at the breakpoint. Bold bases could originate from either reference sequence. The rearrangement between c21orf34 and TMPRSS15 is part of a very complex rearrangement around 17.7 Mb (hg19), which remains unresolved. Primer sequences and positions used to amplify junction fragments (columns 2–7). Genes disrupted at the breakpoints (columns 8–9). (XLSX) [file pone.0060482.s012.xlsx]

## Sheet: Sheet1
Table S7. Rearrangement breakpoints unique to Tc1 Hsa21 and their consequence to gene disruption.
chr21 break point position	Seq Primer1	start	stop	Seq Primer 2	start	Stop	position 1	position 2
ç9700293 T 37017235çn
ç10208816 24726221èn
ç10708238 27263491èn								APP
ç10603042 800 bp alpha satelite 47916774èl	CCTCTCCTCCCTCAAACCTC	10602197	10602216	ATCTCCAAATGCGTCCAATC	47917129	47917148		DIP2A
ç10739714 TG 26376257ç	TGACTGACCTACAAAAAGACTTAGACTC	10740306	10740333	GAAAATCATTACTTCTGGCTCTAAAC	26375890	26375915
è11085336 18942901çn							BAGE
ç11086535 24460837ènl							BAGE
è11167165 25728012ç	GGTGTATGTGTGTGTATTTGTAGTCAAG	11166909	11166936	AGGAAATTCTTAAGATGTCAAGTTGTCT	25727873	25727900
è15970237 16083578è	GGCAGGAAAGAGAGCAAAAA	15970177	15970196	CCAAGCTGTGGTACCATATTAAC	16083626	16083648
ç17769030 26038660è	TGACGGAAATCTGACCACTG	17769088	17769107	TCTGCCTAATCCTTCCTCTTGA	26038713	26038734	c21orf34
è17764356 GG 17771310ç	AGAACCATTCTCGGGTTTTG	17770026	17770045	TCCAGAGTCATTTGTGGTGTG	17771254	17771274	c21orf34	c21orf34
ç17770361 C 19761690èl	TCCCTGCCCTTGTGATAATGTA	17770638	17770659	CCAGTACAGTGCTCAAACCTTG	19761762	19761783	c21orf34	TMPRSS15
è18734159 ACTCCTGAAATCCCAACACTTTGGGAGGC 24880958èl ††	GAGAGTCAGAGGCAGGAGGATA	18733920	18733941	GTGGCGCAATCATAACTCACTA	24881133	24881154
è20514026 CTT 24460819ç	ACCATGTGTCAGGTGCTGTG	20513796	20513815	GTCATGGGTGTGGACATTGA	24460774	24460793
ç20514023 20756929è ▲	TGTCTTAAAAATGTCCCTTTCCA	20514086	20514108	TTGCTGCCATTTCTCTTTCA	20757055	20757074
è20756922 AG 23648470è ▲	CAGGGACAGTGATTTTTAGCC	20756863	20756883	CTGGGGACCCCTGTACTAGA	23648533	23648552
è20893994 C 23648476ç	ACCATTGCCAAGCACTGAAT	20893875	20893894	TCCTTCAGCAAGCCTTTGTT	23648334	23648353
ATç20893996 TATATTATATATTATATATTATATA 24725875ç	TAACACTGCAGCAGAGAGCC	20894060	20894079	TGACCCAAGCATAACGCTAA	24725792	24725811
è22612235 950bp Chr4* 23294101çl	TTCATGGTCATGGAGTTAGTGG	22611927	22611948	CTGATGACCATCTTTGTGAGGA	23293965	23293986	NCAM2
ç23198373 ATATAAATATA 23306917è †	GGGAGGACAAGCATTCAGAT	23198412	23198431	ATTACCCCAGAAGACCCAGG	23306983	23307002
è23306930 T 25728022è †	TGCCTTGTTATTGGCCATCT	23306847	23306866	CCCCATCAATTTTCTCTCCA	25728109	25728128
è26038424 T 27263316ç	TTTAGCACCATTGACAGCCA	26038305	26038324	CAATGGGGAATATGAGGGG	27263053	27263071		APP
è 33223436 CC 36370289è	TCTTGAGTCTCTCCCACCTCTC	33223270	33223291	CCTTTCCTGATGGTCTCAAAGT	36370417	36370438		RUNX1
ç33223573 41bp Un 49bp Chr21**55bp Un 45795618è	CCCTTTGTCTGTCTCCATCTCT	33223924	33223945	CTGCTCCGATATGAACTTCTCC	45795859	45795880		TRPM2
ç37017239 45795619ç	TTTTAACAAGGTTGTCTCACAAAG	37017365	37017388	TTCTCCAATAAGGCCACGTC	45795583	45795602		TRPM2
ATè44314438 TAATATATAATATATATATTAATATATATATATATATTATATAT 47322101è♦	GGGGGACAGAATAAATAAATAAATAAAATA	44314300	44314329	GAAACTAAGAGACAACCTACAGACAGTG	47322273	47322300	NDUFV3	PCBP3
è46868313 CATATC 47916772ç	AGAAGACATCAGGAAGAAACCTCTATTTT	46868022	46868050	TTAAACCAACAACTAGATACACATTTAGGC	47916605	47916634	COL18A1	DIP2A
